# Supplementary material for: Shape-controlled Cu2O nanospheres as bifunctional catalysts boosting the oxidations of glucose and hydrazine
Source: Royal Society of Chemistry journal article supplement (doi:10.1039/d1ce00913c), 2021-01-01
Supplement: d1ce00913c1.pdf [file d1ce00913c1.pdf]

## Supporting Information

### Shape-Controlled Cu<sub>2</sub>O Nanospheres as Bifunctional Catalysts Boosting the Oxidations of Glucose and Hydrazine

*Li Wang,<sup>a</sup> Yutai Wu<sup>b\*</sup>, Chaoyang Sun<sup>b</sup>, Hui Wang<sup>b</sup>, Jianwei Ren<sup>c\*\*</sup>*

<sup>a</sup> School of Chemistry & Environmental Engineering, Pingdingshan University,  
Pingdingshan 467000, China

<sup>b</sup> State Key Laboratory Base for Eco-Chemical Engineering, College of Chemical  
Engineering, Qingdao University of Science and Technology, Qingdao, 266042, China

<sup>c</sup> Department of Mechanical Engineering Science, University of Johannesburg, Cnr  
Kingsway and University Roads, Auckland Park, 2092, Johannesburg, South Africa.

#### **Physical characterizations**

The X-ray diffraction (XRD) was done on Shimadzu XD-3A Instrument, which was fitted with filtered Cu-K $\alpha$  radiation ( $\lambda = 0.15418$  nm) and operated at 30 mA and 40 kV. The  $2\theta$  scan rate for XRD analysis was set at 4 ° min<sup>-1</sup>. The morphologies of the catalysts were evaluated by a Carl Zeiss Ultra Plus field emission scanning electron microscopy (SEM) measurement using a JEM-2010 Electron Microscope (Japan) with an acceleration voltage of 200 kV.

#### **Electrochemical measurements**

An electrochemical work station (CHI 660D) was used to do all electrochemical measurements for this study. A three-electrode electrochemical cell comprises of an

Ag/AgCl as reference electrode (saturated KCl solution), platinum wire as counter electrode, and a working electrode with a thin film catalyst layer coated on a glassy carbon disc (5-mm diameter rotating disc electrode-RDE). The detail procedure of catalyst layer was as follows: 2 mg of as-prepared sample was treated ultrasonically in a 0.4 mL of Nafion® solution (25 wt% Nafion® in ethanol). 8  $\mu$ L of the ultrasonically treated solution was dropped onto the working electrode and then dried in air. Cyclic voltammetry (CV) measurement was done in the three-electrode system using 0.1 M NaOH solution as electrolyte. The potential scan rate was 50 mV s<sup>-1</sup> in the potential range 0.20–0.80 V vs. Ag/AgCl. The electrode was firstly scanned in NaOH in the absence of glucose, subsequently scanned in NaOH with 500  $\mu$ M, 1 mM, 2 mM, 3 mM, 4 mM, 5 mM, 6 mM, 7 mM, 8 mM and 9 mM of glucose, respectively. Responses of the as-prepared electrodes with increasing glucose concentration were carried out in a 0.1 M NaOH solution and the rotation speed of the RDE was set at 1000 rpm. The selectivity of the electrodes was firstly tested in 0.1 M NaOH with 1000  $\mu$ M of glucose and then 0.1 mM of ascorbic acid (AA), uric acid (UA), NaCl and L-glucose was introduced into the NaOH/glucose solution, respectively.

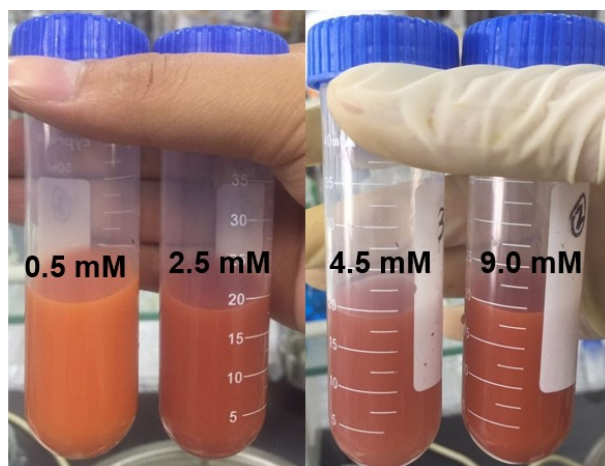

**Figure S1.** Optical images of Cu<sub>2</sub>O solutions prepared with different PVP concentrations.

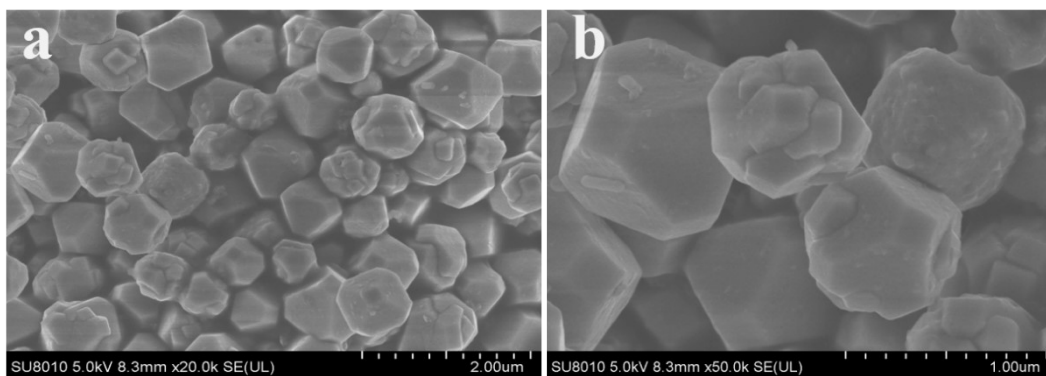

**Figure S2.** SEM images of Cu<sub>2</sub>O nanoparticles synthesized by 4.5 mM PVP.

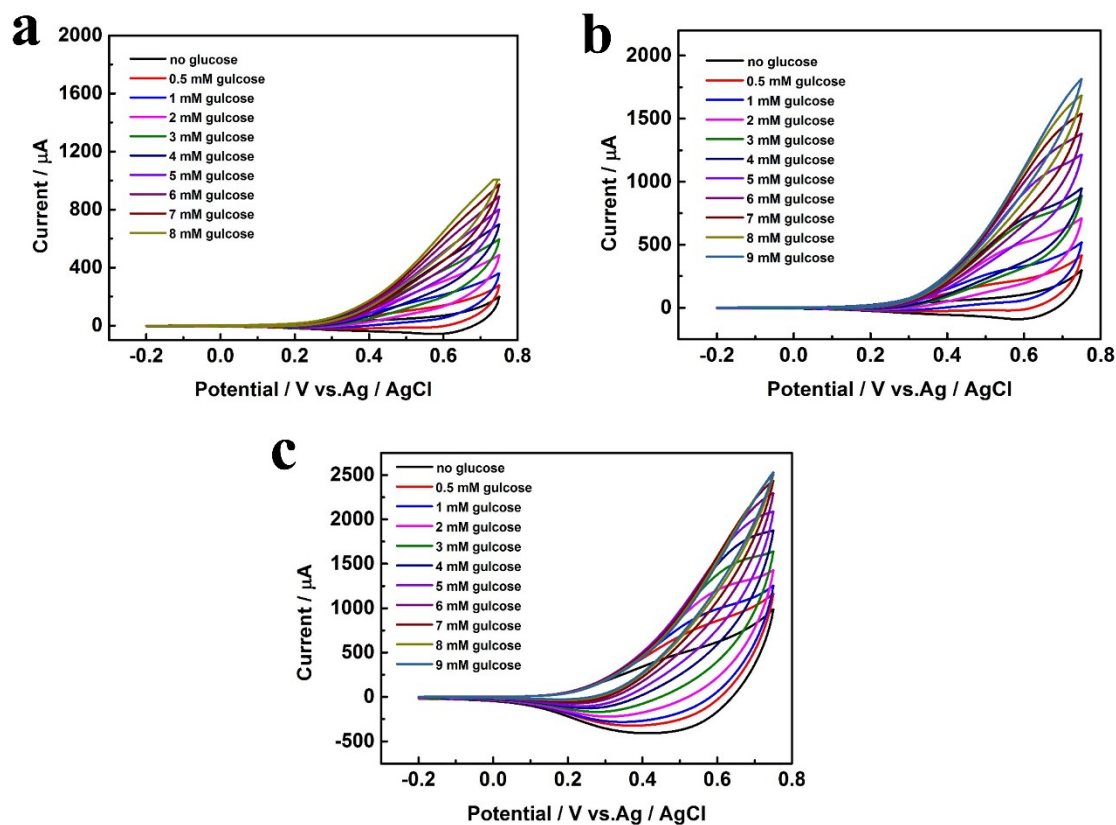

**Figure S3.** CVs obtained for (a)  $\text{Cu}_2\text{O}$  nanocubes, (b) nanopolyhedron, (c) nanosphere on GCE in 0.1 M NaOH + 0.5, 1.0, 2.0, 3.0, 4.0, 5.0, 6.0, 7.0, 8.0 and 9.0 mM glucose at a scan rate of  $50 \text{ mV s}^{-1}$ .

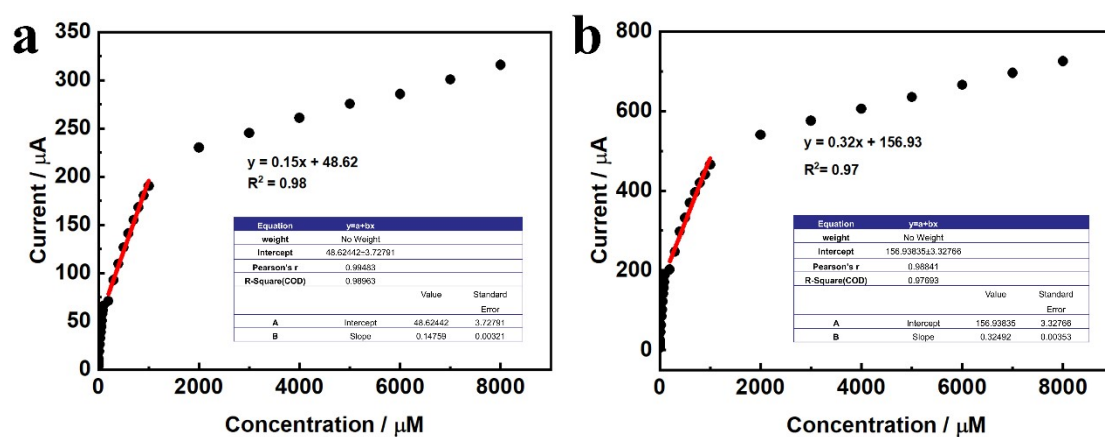

**Figure S4.** The corresponding calibration curves of (a)  $\text{Cu}_2\text{O}$  nanocubes and (b)  $\text{Cu}_2\text{O}$  nanopolyhedron.

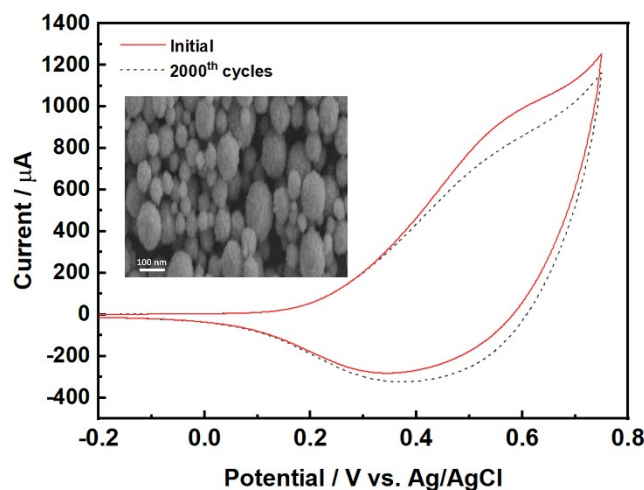

**Figure S5.** CVs obtained for initial Cu<sub>2</sub>O nanosphere sample and after 2000<sup>th</sup> cycles Cu<sub>2</sub>O nanosphere sample in 0.1 M NaOH + 1 mM glucose at scan rate of 50 mV s<sup>-1</sup>. (Inset: the SEM image of Cu<sub>2</sub>O sphere after electrochemical degradation tests)

**Table S1.** An indicator of HOR activity (re. HOR onset potential) of Cu<sub>2</sub>O nanosphere catalyst compared with previously Cu-based HOR catalysts.

| Catalyst                     | The onset potential of hydrazine oxidation | The electrolyte                                 | Scan rate /mV s <sup>-1</sup> | Reference |
|------------------------------|--------------------------------------------|-------------------------------------------------|-------------------------------|-----------|
| Cu <sub>2</sub> O nanosphere | -0.107V vs. Ag/AgCl(0.857V vs.RHE)         | 0.1 M KOH + 0.1 M N <sub>2</sub> H <sub>4</sub> | 50                            | This work |
| Cu metal electrode           | -0.193V vs. RHE                            | 1.0 M KOH + 5 wt% N <sub>2</sub> H <sub>4</sub> | 20                            | 1         |
| Cu-GP                        | -0.10V vs SCE (0.91V vs. RHE)              | 0.1 M KOH + 10 mM N <sub>2</sub> H <sub>4</sub> | 100                           | 2         |
| NPCF                         | -0.87V vs. SCE (0.23V vs. RHE)             | 3 M NaOH + 1 M N <sub>2</sub> H <sub>4</sub>    | 50                            | 3         |
| Nanotextured Cu foam         | -0.70V vs. Ag/AgCl (0.37 vs. RHE)          | 6 M KOH+1 M N <sub>2</sub> H <sub>4</sub>       | 50                            | 4         |
| S-RGO                        | -0.21V vs. SCE(0.23V vs. RHE)              | 0.1 M KOH + 10 mM N <sub>2</sub> H <sub>4</sub> | 100                           | 5         |
| Cu (hydr)oxide               | -0.10V vs. Ag/AgCl (0.87V vs. RHE)         | 0.1 M NaOH+10 mM N <sub>2</sub> H <sub>4</sub>  | 50                            | 6         |

---

|            |                     |                                                 |    |   |
|------------|---------------------|-------------------------------------------------|----|---|
|            | vs. RHE)            |                                                 |    |   |
| Flower-CuO | -0.104V vs. Ag/AgCl | 0.1 M KOH + 0.1 M N <sub>2</sub> H <sub>4</sub> | 50 | 7 |
|            | (0.789V vs. RHE)    |                                                 |    |   |

---

1. K. Asazawa, K. Yamada, H. Tanaka, M. Taniguchi and K. Oguro, *J. Power Sources*, 2009, **191**, 362-365.
2. H. C. Gao, Y. X. Wang, F. Xiao, C. B. Ching and H. W. Duan, *J. Physical Chem. C*, 2012, **116**, 7719-7725.
3. F. L. Jia, J. H. Zhao and X. X. Yu, *J. Power Sources*, 2013, **222**, 135-139.
4. B. Filanovsky, E. Granot, I. Presman, I. Kuras and F. Patolsky, *J. Power Sources*, 2014, **246**, 423-429.
5. C. Liu, H. Zhang, Y. Tang and S. Luo, *J. Mater. Chem. A*, 2014, **2**, 4580-4587.
6. G. Karim-Nezhad, R. Jafarloo and P. S. Dorraji, *Electrochim. Acta*, 2009, **54**, 5721-5726.
7. Y. Ma, H. Wang, J. Key, S. Ji, W. Lv and R. Wang, *J. Power Sources*, 2015, **300**, 344-350.
